# Supplementary material
Source: ML conference proceedings conference paper supplement (https://proceedings.mlr.press/v70/jernite17a.html)
Supplement: Supplementary file [file jernite17a-supp.pdf]

## Simultaneous Learning of Trees and Representations for Extreme Classification with Application to Language Modeling (Supplementary material)

### 9. Geometric interpretation of probabilities $p_j^{(n)}$ and $p_{j|i}^{(n)}$

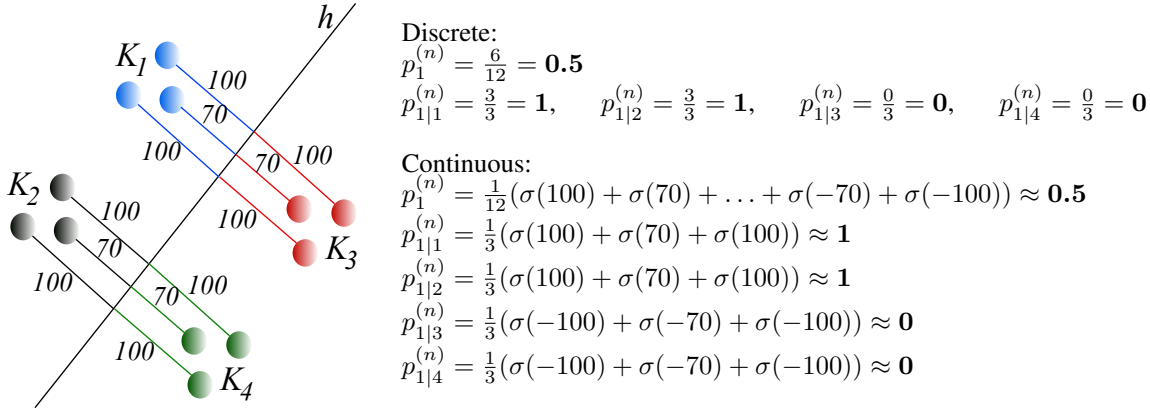

Figure 3. The comparison of discrete and continuous definitions of probabilities  $p_j^{(n)}$  and  $p_{j|i}^{(n)}$  on a simple example with  $K = 4$  classes and binary tree ( $M = 2$ ).  $n$  is an exemplary node, e.g. root.  $\sigma$  denotes sigmoid function. Color circles denote data points.

**Remark 3.** One could define  $p_j^{(n)}$  as the ratio of the number of examples that reach node  $n$  and are sent to its  $j^{\text{th}}$  child to the total the number of examples that reach node  $n$  and  $p_{j|i}^{(n)}$  as the ratio of the number of examples that reach node  $n$ , correspond to label  $i$ , and are sent to the  $j^{\text{th}}$  child of node  $n$  to the total the number of examples that reach node  $n$  and correspond to label  $i$ . We instead look at the continuous counter-parts of these discrete definitions as given by Equations 8 and 9 and illustrated in Figure 3 (note that continuous definitions have elegant geometric interpretation based on margins), which simplifies the optimization problem.

### 10. Theoretical proofs

*Proof of Lemma 1.* Recall the form of the objective defined in 6:

$$\begin{aligned} J_n &= \frac{2}{M} \sum_{i=1}^K q_i^{(n)} \left( \sum_{j=1}^M |p_j^{(n)} - p_{j|i}^{(n)}| \right) \\ &= \frac{2}{M} \mathbb{E}_{i \sim q^{(n)}} \left[ f_n^J(i, p_{\cdot| \cdot}^{(n)}, q^{(n)}) \right] \end{aligned}$$

Where:

$$\begin{aligned} f_n^J(i, p_{\cdot| \cdot}^{(n)}, q^{(n)}) &= \sum_{j=1}^M |p_j^{(n)} - p_{j|i}^{(n)}| = \sum_{j=1}^M \left| p_{j|i}^{(n)} - \sum_{i'=1}^K q_{i'}^{(n)} p_{j|i'}^{(n)} \right| \\ &= \sum_{j=1}^M \left| \sum_{i'=1}^K (\mathbb{1}_{i=i'} - q_{i'}^{(n)}) p_{j|i'}^{(n)} \right| \end{aligned}$$

Hence:

$$\frac{\partial f_n^J(i, p_{\cdot|\cdot}^{(n)}, q^{(n)})}{\partial p_{j|i}^{(n)}} = (1 - q_i^{(n)}) \text{sign}(p_{j|i}^{(n)} - p_j^{(n)})$$

And:

$$\begin{aligned} \frac{\partial f_n^J(i, p_{\cdot|\cdot}^{(n)}, q^{(n)})}{\partial \log p_{j|i}^{(n)}} &= (1 - q_i^{(n)}) \text{sign}(p_{j|i}^{(n)} - p_j^{(n)}) \frac{\partial p_{j|i}^{(n)}}{\partial \log p_{j|i}^{(n)}} \\ &= (1 - q_i^{(n)}) \text{sign}(p_{j|i}^{(n)} - p_j^{(n)}) p_{j|i}^{(n)} \end{aligned}$$

By assigning each label  $j$  to a specific child  $i$  under the constraint that no child has more than  $L$  labels, we take a step in the direction  $\partial E \in \{0, 1\}^{M \times K}$ , where:

$$\begin{aligned} \forall i \in [1, K], \quad \sum_{j=1}^M \partial E_{j,i} &= 1 \\ \text{and} \\ \forall j \in [1, M], \quad \sum_{i=1}^K \partial E_{j,i} &\leq L \end{aligned}$$

Thus:

$$\begin{aligned} \frac{\partial J_n}{\partial p_{\cdot|\cdot}^{(n)}} \partial E &= \frac{2}{M} \frac{\mathbb{E}_{i \sim q^{(n)}} [f_n^J(i, p_{\cdot|\cdot}^{(n)}, q^{(n)})]}{\partial p_{\cdot|\cdot}^{(n)}} \partial E \\ &= \frac{2}{M} \sum_{i=1}^K q_i^{(n)} (1 - q_i^{(n)}) \sum_{j=1}^M \left( \text{sign}(p_{j|i}^{(n)} - p_j^{(n)}) \partial E_{j,i} \right) \end{aligned} \quad (13)$$

And:

$$\frac{\partial J_n}{\partial \log p_{\cdot|\cdot}^{(n)}} \partial E = \frac{2}{M} \sum_{i=1}^K q_i^{(n)} (1 - q_i^{(n)}) \sum_{j=1}^M \left( \text{sign}(p_{j|i}^{(n)} - p_j^{(n)}) p_{j|i}^{(n)} \partial E_{j,i} \right) \quad (14)$$

If there exists such an assignment for which 13 is positive, then the greedy method proposed in 2 finds it. Indeed, suppose that Algorithm 2 assigns label  $i$  to child  $j$  and  $i'$  to  $j'$ . Suppose now that another assignment  $\partial E'$  sends  $i$  to  $j'$  and  $i'$  to  $j$ . Then:

$$\frac{\partial J_n}{\partial p_{\cdot|\cdot}^{(n)}} (\partial E - \partial E') = \left( \frac{\partial J_n}{\partial p_{j|i}^{(n)}} + \frac{\partial J_n}{\partial p_{j'|i'}^{(n)}} \right) - \left( \frac{\partial J_n}{\partial p_{j|i'}^{(n)}} + \frac{\partial J_n}{\partial p_{j'|i}^{(n)}} \right) \quad (15)$$

Since the algorithm assigns children by descending order of  $\frac{\partial J_n}{\partial p_{j|i}^{(n)}}$  until a child  $j$  is full, we have:

$$\frac{\partial J_n}{\partial p_{j|i}^{(n)}} \geq \frac{\partial J_n}{\partial p_{j|i'}^{(n)}} \quad \text{and} \quad \frac{\partial J_n}{\partial p_{j'|i'}^{(n)}} \geq \frac{\partial J_n}{\partial p_{j'|i}^{(n)}}$$

Hence:

$$\frac{\partial J_n}{\partial p_{\cdot|\cdot}^{(n)}} (\partial E - \partial E') \geq 0$$

Thus, the greedy algorithm finds the assignment that most increases  $J_n$  most under the children size constraints.

Moreover,  $\frac{\partial J_n}{\partial p_{\cdot|\cdot}^{(n)}}$  is always positive for  $L \leq M$  or  $L \geq 2M(M - 2)$ .  $\square$

*Proof of Lemma 2.* Both  $J_n$  and  $J_T$  are defined as the sum of non-negative values which gives the lower-bound. We next derive the upper-bound on  $J_n$ . Recall:

$$J_n = \frac{2}{M} \sum_{j=1}^M \sum_{i=1}^K q_i^{(n)} |p_j^{(n)} - p_{j|i}^{(n)}| = \frac{2}{M} \sum_{j=1}^M \sum_{i=1}^K q_i^{(n)} \left| \sum_{l=1}^K q_l^{(n)} p_{j|l}^{(n)} - p_{j|i}^{(n)} \right|$$

since  $p_j^{(n)} = \sum_{l=1}^K q_l^{(n)} p_{j|l}^{(n)}$ . The objective  $J_n$  is maximized on the extremes of the  $[0, 1]$  interval. Thus, define the following two sets of indices:

$$O_j = \{i : i \in \{1, 2, \dots, K\}, p_{j|i}^{(n)} = 1\} \quad \text{and} \quad Z_j = \{i : i \in \{1, 2, \dots, K\}, p_{j|i}^{(n)} = 0\}.$$

We omit indexing these sets with  $n$  for the ease of notation. We continue as follows

$$\begin{aligned} J_n &\leq \frac{2}{M} \sum_{j=1}^M \left[ \sum_{i \in O_j} q_i^{(n)} \left( 1 - \sum_{l \in O_j} q_l^{(n)} \right) + \sum_{i \in Z_j} q_i^{(n)} \sum_{l \in O_j} q_l^{(n)} \right] \\ &= \frac{4}{M} \sum_{j=1}^M \left[ \sum_{i \in O_j} q_i^{(n)} - \left( \sum_{i \in O_j} q_i^{(n)} \right)^2 \right] \\ &= \frac{4}{M} \left[ 1 - \sum_{j=1}^M \left( \sum_{i \in O_j} q_i^{(n)} \right)^2 \right], \end{aligned}$$

where the last inequality is the consequence of the following:  $\sum_{j=1}^M p_j^{(n)} = 1$  and  $p_j^{(n)} = \sum_{l=1}^K q_l^{(n)} p_{j|l}^{(n)} = \sum_{i \in O_j} q_i^{(n)}$ , thus  $\sum_{j=1}^M \sum_{i \in O_j} q_i^{(n)} = 1$ . Applying Jensen's inequality to the last inequality obtained gives

$$\begin{aligned} J_n &\leq \frac{4}{M} - 4 \left[ \sum_{j=1}^M \left( \frac{1}{M} \sum_{i \in O_j} q_i^{(n)} \right) \right]^2 \\ &= \frac{4}{M} \left( 1 - \frac{1}{M} \right) \end{aligned}$$

That ends the proof.  $\square$

*Proof of Lemma 3.* We start from proving that if the split in node  $n$  is perfectly balanced, i.e.  $\forall_{j=\{1,2,\dots,M\}} p_j^{(n)} = \frac{1}{M}$ , and perfectly pure, i.e.  $\forall_{j=\{1,2,\dots,M\}} \min_{i=\{1,2,\dots,K\}} (p_{j|i}^{(n)}, 1 - p_{j|i}^{(n)}) = 0$ , then  $J_n$  admits the highest value  $J_n = \frac{4}{M} \left( 1 - \frac{1}{M} \right)$ . Since the split is maximally balanced we write:

$$J_n = \frac{2}{M} \sum_{j=1}^M \sum_{i=1}^K q_i^{(n)} \left| \frac{1}{M} - p_{j|i}^{(n)} \right|.$$

Since the split is maximally pure, each  $p_{j|i}^{(n)}$  can only take value 0 or 1. As in the proof of previous lemma, define two sets of indices:

$$O_j = \{i : i \in \{1, 2, \dots, K\}, p_{j|i}^{(n)} = 1\} \quad \text{and} \quad Z_j = \{i : i \in \{1, 2, \dots, K\}, p_{j|i}^{(n)} = 0\}.$$

We omit indexing these sets with  $n$  for the ease of notation. Thus

$$\begin{aligned} J_n &= \frac{2}{M} \sum_{j=1}^M \left[ \sum_{i \in O_j} q_i^{(n)} \left( 1 - \frac{1}{M} \right) + \sum_{i \in Z_j} q_i^{(n)} \frac{1}{M} \right] \\ &= \frac{2}{M} \sum_{j=1}^M \left[ \sum_{i \in O_j} q_i^{(n)} \left( 1 - \frac{1}{M} \right) + \frac{1}{M} \left( 1 - \sum_{i \in O_j} q_i^{(n)} \right) \right] \\ &= \frac{2}{M} \left( 1 - \frac{2}{M} \right) \sum_{j=1}^M \sum_{i \in O_j} q_i^{(n)} + \frac{2}{M} \\ &= \frac{4}{M} \left( 1 - \frac{1}{M} \right), \end{aligned}$$

where the last equality comes from the fact that  $\sum_{j=1}^M p_j^{(n)} = 1$  and  $p_j^{(n)} = \sum_{l=1}^K q_l^{(n)} p_{j|l}^{(n)} = \sum_{i \in O_j} q_i^{(n)}$ , thus  $\sum_{j=1}^M \sum_{i \in O_j} q_i^{(n)} = 1$ .

Thus we are done with proving one induction direction. Next we prove that if  $J_n$  admits the highest value  $J_n = \frac{4}{M} (1 - \frac{1}{M})$ , then the split in node  $n$  is perfectly balanced, i.e.  $\forall_{j=\{1,2,\dots,M\}} p_j^{(n)} = \frac{1}{M}$ , and perfectly pure, i.e.  $\forall_{j=\{1,2,\dots,M\}} \min_{i=\{1,2,\dots,K\}} (p_{j|i}^{(n)}, 1 - p_{j|i}^{(n)}) = 0$ .

Without loss of generality assume each  $q_i^{(n)} \in (0, 1)$ . The objective  $J_n$  is certainly maximized in the extremes of the interval  $[0, 1]$ , where each  $p_{j|i}^{(n)}$  is either 0 or 1. Also, at maximum it cannot be that for any given  $j$ , all  $p_{j|i}^{(n)}$ 's are 0 or all  $p_{j|i}^{(n)}$ 's are 1. The function  $J(h)$  is differentiable in these extremes. Next, define three sets of indices:

$$\mathcal{A}_j = \left\{ i : \sum_{l=1}^K q_i^{(n)} p_{j|l}^{(n)} \geq p_{j|i}^{(n)} \right\} \quad \text{and} \quad \mathcal{B}_j = \left\{ i : \sum_{l=1}^K q_i^{(n)} p_{j|l}^{(n)} < p_{j|i}^{(n)} \right\} \quad \text{and} \quad \mathcal{C}_j = \left\{ i : \sum_{l=1}^K q_i^{(n)} p_{j|l}^{(n)} > p_{j|i}^{(n)} \right\}.$$

We omit indexing these sets with  $n$  for the ease of notation. Objective  $J_n$  can then be re-written as

$$J_n = \frac{2}{M} \sum_{j=1}^M \left[ \sum_{i \in \mathcal{A}_j} q_i^{(n)} \left( \sum_{l=1}^K q_i^{(n)} p_{j|l}^{(n)} - p_{j|i}^{(n)} \right) + 2 \sum_{i \in \mathcal{B}_j} q_i^{(n)} \left( p_{j|i}^{(n)} - \sum_{l=1}^K q_i^{(n)} p_{j|l}^{(n)} \right) \right],$$

We next compute the derivatives of  $J_n$  with respect to  $p_{j|z}^{(n)}$ , where  $z = \{1, 2, \dots, K\}$ , everywhere where the function is differentiable and obtain

$$\frac{\partial J_n}{\partial p_{j|z}^{(n)}} = \begin{cases} 2q_z^{(n)} (\sum_{i \in \mathcal{C}_j} q_i^{(n)} - 1) & \text{if } z \in \mathcal{C}_j \\ 2q_z^{(n)} (1 - \sum_{i \in \mathcal{B}_j} q_i^{(n)}) & \text{if } z \in \mathcal{B}_j \end{cases},$$

Note that in the extremes of the interval  $[0, 1]$  where  $J_n$  is maximized, it cannot be that  $\sum_{i \in \mathcal{C}_j} q_i^{(n)} = 1$  or  $\sum_{i \in \mathcal{B}_j} q_i^{(n)} = 1$  thus the gradient is non-zero. This fact and the fact that  $J_n$  is convex imply that  $J_n$  can *only* be maximized at the extremes of the  $[0, 1]$  interval. Thus if  $J_n$  admits the highest value, then the node split is perfectly pure. We still need to show that if  $J_n$  admits the highest value, then the node split is also perfectly balanced. We give a proof by contradiction, thus we assume that at least for one value of  $j$ ,  $p_j^{(n)} \neq \frac{1}{M}$ , or in other words if we decompose each  $p_j^{(n)}$  as  $p_j^{(n)} = \frac{1}{M} + x_j$ , then at least for one value of  $j$ ,  $x_j \neq 0$ . Lets once again define two sets of indices (we omit indexing  $x_j$  and these sets with  $n$  for the ease of notation):

$$O_j = \{i : i \in \{1, 2, \dots, K\}, p_{j|i}^{(n)} = 1\} \quad \text{and} \quad Z_j = \{i : i \in \{1, 2, \dots, K\}, p_{j|i}^{(n)} = 0\},$$

and recall that  $p_j^{(n)} = \sum_{l=1}^K q_l^{(n)} p_{j|l}^{(n)} = \sum_{i \in O_j} q_i^{(n)}$ . We proceed as follows

$$\begin{aligned}
 \frac{4}{M} \left(1 - \frac{1}{M}\right) = J_n &= \frac{2}{M} \sum_{j=1}^M \left[ \sum_{i \in O_j} q_i^{(n)} (1 - p_j^{(n)}) + \sum_{i \in Z_j} q_i^{(n)} p_j^{(n)} \right] \\
 &= \frac{2}{M} \sum_{j=1}^M \left[ p_j^{(n)} (1 - p_j^{(n)}) + p_j^{(n)} (1 - p_j^{(n)}) \right] \\
 &= \frac{4}{M} \sum_{j=1}^M \left[ p_j^{(n)} - (p_j^{(n)})^2 \right] \\
 &= \frac{4}{M} \left[ 1 - \sum_{j=1}^M (p_j^{(n)})^2 \right] \\
 &= \frac{4}{M} \left[ 1 - \sum_{j=1}^M \left( \frac{1}{M} + x_j \right)^2 \right] \\
 &= \frac{4}{M} \left( 1 - \frac{1}{M} - \frac{2}{M} \sum_{j=1}^M x_j - \sum_{j=1}^M x_j^2 \right) \\
 &< \frac{4}{M} \left( 1 - \frac{1}{M} \right)
 \end{aligned}$$

Thus we obtain the contradiction which ends the proof.  $\square$

*Proof of Lemma 4.* Since we note that the split is perfectly pure, then each  $p_{j|i}^{(n)}$  is either 0 or 1. Thus we define two sets

$$O_j = \{i : i \in \{1, 2, \dots, K\}, p_{j|i}^{(n)} = 1\} \quad \text{and} \quad Z_j = \{i : i \in \{1, 2, \dots, K\}, p_{j|i}^{(n)} = 0\}.$$

and thus

$$J_n = \frac{2}{M} \sum_{j=1}^M \left[ \sum_{i \in O_j} q_i^{(n)} (1 - p_j) + \sum_{i \in Z_j} q_i^{(n)} p_j \right]$$

Note that  $p_j = \sum_{i \in O_j} q_i^{(n)}$ . Then

$$J_n = \frac{2}{M} \sum_{j=1}^M [p_j (1 - p_j) + (1 - p_j) p_j] = \frac{4}{M} \sum_{j=1}^M p_j (1 - p_j) = \frac{4}{M} \left( 1 - \sum_{j=1}^M p_j^2 \right)$$

and thus

$$\sum_{j=1}^M p_j^2 = 1 - \frac{M J_n}{4}. \tag{16}$$

Lets express  $p_j$  as  $p_j = \frac{1}{M} + \epsilon_j$ , where  $\epsilon_j \in [-\frac{1}{M}, 1 - \frac{1}{M}]$ . Then

$$\sum_{j=1}^M p_j^2 = \sum_{j=1}^M \left( \frac{1}{M} + \epsilon_j \right)^2 = \frac{1}{M} + \frac{2}{M} \sum_{j=1}^M \epsilon_j + \sum_{j=1}^M \epsilon_j^2 = \frac{1}{M} + \sum_{j=1}^M \epsilon_j^2, \tag{17}$$

since  $\frac{2}{M} \sum_{j=1}^M \epsilon_j = 0$ . Thus combining Equation 16 and 17

$$\frac{1}{M} + \sum_{j=1}^M \epsilon_j^2 = 1 - \frac{M J_n}{4}$$

and thus

$$\sum_{j=1}^M \epsilon_j^2 = 1 - \frac{1}{M} - \frac{MJ_n}{4}.$$

The last statement implies that

$$\max_{j=1,2,\dots,M} \epsilon_j \leq \sqrt{1 - \frac{1}{M} - \frac{MJ_n}{4}},$$

which is equivalent to

$$\min_{j=1,2,\dots,M} p_j = \frac{1}{M} - \max_j \epsilon_j \geq \frac{1}{M} - \sqrt{1 - \frac{1}{M} - \frac{MJ_n}{4}} = \frac{1}{M} - \frac{\sqrt{M(J^* - J_n)}}{2}.$$

□

*Proof of Lemma 5.* Since the split is perfectly balanced we have the following:

$$J_n = \frac{2}{M} \sum_{j=1}^M \sum_{i=1}^K q_i^{(n)} \left| \frac{1}{M} - p_{j|i}^{(n)} \right| = \frac{2}{M} \sum_{i=1}^K \sum_{j=1}^M q_i^{(n)} \left| \frac{1}{M} - p_{j|i}^{(n)} \right|$$

Define two sets

$$\mathcal{A}_i = \{j : j \in \{1, 2, \dots, K\}, p_{j|i}^{(n)} < \frac{1}{M}\} \quad \text{and} \quad \mathcal{B}_i = \{j : j \in \{1, 2, \dots, K\}, p_{j|i}^{(n)} \geq \frac{1}{M}\}.$$

Then

$$\begin{aligned} J_n &= \frac{2}{M} \sum_{i=1}^K \left[ \sum_{j \in \mathcal{A}_i} q_i^{(n)} \left( \frac{1}{M} - p_{j|i}^{(n)} \right) + \sum_{j \in \mathcal{B}_i} q_i^{(n)} \left( p_{j|i}^{(n)} - \frac{1}{M} \right) \right] \\ &= \frac{2}{M} \sum_{i=1}^K q_i^{(n)} \left[ \sum_{j \in \mathcal{A}_i} \left( \frac{1}{M} - p_{j|i}^{(n)} \right) + \sum_{j \in \mathcal{B}_i} \left( p_{j|i}^{(n)} - \frac{1}{M} \right) \right] \\ &= \frac{2}{M} \sum_{i=1}^K q_i^{(n)} \left[ \sum_{j \in \mathcal{A}_i} \left( \frac{1}{M} - p_{j|i}^{(n)} \right) + \sum_{j \in \mathcal{B}_i} \left( \left(1 - \frac{1}{M}\right) - \left(1 - p_{j|i}^{(n)}\right) \right) \right] \end{aligned}$$

Recall that the optimal value of  $J_n$  is:

$$J^* = \frac{4}{M} \left(1 - \frac{1}{M}\right) = \frac{2}{M} \sum_{i=1}^N q_i^{(n)} \left[ (M-1) \frac{1}{M} + \left(1 - \frac{1}{M}\right) \right] = \frac{2}{M} \sum_{i=1}^N q_i^{(n)} \left[ \left( \sum_{j \in \mathcal{A}_i \cup \mathcal{B}_i} \frac{1}{M} \right) - \frac{1}{M} + \left(1 - \frac{1}{M}\right) \right]$$

Note  $\mathcal{A}_i$  can have at most  $M-1$  elements. Furthermore,  $\forall j \in \mathcal{A}_i, p_{j|i}^{(n)} < 1 - p_{j|i}^{(n)}$ . Then, we have:

$$J^* - J_n = \frac{2}{M} \sum_{i=1}^K q_i^{(n)} \left[ \sum_{j \in \mathcal{A}_i} p_{j|i}^{(n)} + \sum_{j \in \mathcal{B}_i} \left( \left(1 - p_{j|i}^{(n)}\right) + \frac{1}{M} - \left(1 - \frac{1}{M}\right) \right) - \frac{1}{M} + \left(1 - \frac{1}{M}\right) \right]$$

Hence, since  $\mathcal{B}_i$  has at least one element:

$$\begin{aligned} J^* - J_n &\geq \frac{2}{M} \sum_{i=1}^K q_i^{(n)} \left[ \sum_{j \in \mathcal{A}_i} p_{j|i}^{(n)} + \sum_{j \in \mathcal{B}_i} \left(1 - p_{j|i}^{(n)}\right) \right] \\ &\geq \frac{2}{M} \sum_{i=1}^K q_i^{(n)} \left[ \sum_{j=1}^M \min(p_{j|i}^{(n)}, 1 - p_{j|i}^{(n)}) \right] \\ &\geq 2\alpha \end{aligned}$$

□

*Proof of Theorem 1.* Let the weight of the tree leaf be defined as the probability that a randomly chosen data point  $x$  drawn from some fixed target distribution  $\mathcal{P}$  reaches this leaf. Suppose at time step  $t$ ,  $n$  is the heaviest leaf and has weight  $w$ . Consider splitting this leaf to  $M$  children  $n_1, n_2, \dots, n_M$ . Let the weight of the  $j^{\text{th}}$  child be denoted as  $w_j$ . Also for the ease of notation let  $p_j$  refer to  $p_j^{(n)}$  (recall that  $\sum_{j=1}^M p_j = 1$ ) and  $p_{j|i}$  refer to  $p_{j|i}^{(n)}$ , and furthermore let  $q_i$  be the shorthand for  $q_i^{(n)}$ . Recall that  $p_j = \sum_{i=1}^K q_i p_{j|i}$  and  $\sum_{i=1}^K q_i = 1$ . Notice that for any  $j = \{1, 2, \dots, M\}$ ,  $w_j = w p_j$ . Let  $\mathbf{q}$  be the  $k$ -element vector with  $i^{\text{th}}$  entry equal to  $q_i$ . Define the following function:  $\tilde{G}^e(\mathbf{q}) = \sum_{i=1}^K q_i \ln\left(\frac{1}{q_i}\right)$ . Recall the expression for the entropy of tree leaves:  $G^e = \sum_{l \in \mathcal{L}} w_l \sum_{i=1}^K q_i^{(l)} \ln\left(\frac{1}{q_i^{(l)}}\right)$ , where  $\mathcal{L}$  is a set of all tree leaves. Before the split the contribution of node  $n$  to  $G^e$  was equal to  $w \tilde{G}^e(\mathbf{q})$ . Note that for any  $j = \{1, 2, \dots, M\}$ ,  $q_i^{(n_j)} = \frac{q_i p_{j|i}}{p_j}$  is the probability that a randomly chosen  $x$  drawn from  $\mathcal{P}$  has label  $i$  given that  $x$  reaches node  $n_j$ . For brevity, let  $q_i^{n_j}$  be denoted as  $q_{j,i}$ . Let  $\mathbf{q}_j$  be the  $k$ -element vector with  $i^{\text{th}}$  entry equal to  $q_{j,i}$ . Notice that  $\mathbf{q} = \sum_{j=1}^M p_j \mathbf{q}_j$ . After the split the contribution of the same, now internal, node  $n$  changes to  $w \sum_{j=1}^M p_j \tilde{G}^e(\mathbf{q}_j)$ . We denote the difference between the contribution of node  $n$  to the value of the entropy-based objectives in times  $t$  and  $t+1$  as

$$\Delta_t^e := G_t^e - G_{t+1}^e = w \left[ \tilde{G}^e(\mathbf{q}) - \sum_{j=1}^M p_j \tilde{G}^e(\mathbf{q}_j) \right]. \quad (18)$$

The entropy function  $\tilde{G}^e$  is strongly concave with respect to  $l_1$ -norm with modulus 1, thus we extend the inequality given by Equation 7 in (Choromanska et al., 2016) by applying Theorem 5.2. from (Azocar et al., 2011) and obtain the following bound

$$\begin{aligned} \Delta_t^e &= w \left[ \tilde{G}^e(\mathbf{q}) - \sum_{j=1}^M p_j \tilde{G}^e(\mathbf{q}_j) \right] \\ &\geq w \frac{1}{2} \sum_{j=1}^M p_j \left\| \mathbf{q}_j - \sum_{l=1}^M p_l \mathbf{q}_l \right\|_1^2 \\ &= w \frac{1}{2} \sum_{j=1}^M p_j \left( \sum_{i=1}^K \left| \frac{q_i p_{j|i}}{p_j} - \sum_{l=1}^M p_l \frac{q_i p_{l|i}}{p_l} \right| \right)^2 \\ &= w \frac{1}{2} \sum_{j=1}^M p_j \left( \sum_{i=1}^K q_i \left| \frac{p_{j|i}}{p_j} - \sum_{l=1}^M p_{l|i} \right| \right)^2 \\ &= w \frac{1}{2} \sum_{j=1}^M p_j \left( \sum_{i=1}^K q_i \left| \frac{p_{j|i}}{p_j} - 1 \right| \right)^2 \\ &= w \frac{1}{2} \sum_{j=1}^M \frac{1}{p_j} \left( \sum_{i=1}^K q_i |p_{j|i} - p_j| \right)^2. \end{aligned}$$

Before proceeding, we will bound each  $p_j$ . Note that by the *Weak Hypothesis Assumption* we have

$$\gamma \in \left[ \frac{M}{2} \min_{j=1,2,\dots,M} p_j, 1 - \frac{M}{2} \min_{j=1,2,\dots,M} p_j \right],$$

thus

$$\min_{j=1,2,\dots,M} p_j \geq \frac{2\gamma}{M},$$

thus all  $p_j$ s are such that  $p_j \geq \frac{2\gamma}{M}$ . Thus

$$\max_{j=1,2,\dots,M} p_j \leq 1 - \frac{2\gamma}{M}(M-1) = \frac{M(1-2\gamma) + 2\gamma}{M}.$$

Thus all  $p_j$ s are such that  $p_j \leq \frac{M(1-2\gamma)+2\gamma}{M}$ .

$$\begin{aligned}
 \Delta_t^e &\geq w \frac{M^2}{2[(M(1-2\gamma)+2\gamma)]} \sum_{j=1}^M \frac{1}{M} \left( \sum_{i=1}^K q_i |p_{j|i} - p_j| \right)^2 \\
 &\geq w \frac{M^2}{2[(M(1-2\gamma)+2\gamma)]} \left( \sum_{j=1}^M \frac{1}{M} \sum_{i=1}^K q_i |p_{j|i} - p_j| \right)^2 \\
 &= w \frac{M^2}{8[(M(1-2\gamma)+2\gamma)]} \left( \frac{2}{M} \sum_{j=1}^M \sum_{i=1}^K q_i |p_{j|i} - p_j| \right)^2 \\
 &= \frac{M^2}{[(M(1-2\gamma)+2\gamma)]} \frac{wJ_n^2}{8},
 \end{aligned}$$

where the last inequality is a consequence of Jensen's inequality.  $w$  can further be lower-bounded by noticing the following

$$G_t^e = \sum_{l \in \mathcal{L}} w_l \sum_{i=1}^K q_i^{(l)} \ln \left( \frac{1}{q_i^{(l)}} \right) \leq \sum_{l \in \mathcal{L}} w_l \ln K \leq w \ln K \sum_{l \in \mathcal{L}} 1 = [t(M-1)+1]w \ln K \leq (t+1)(M-1)w \ln K,$$

where the first inequality results from the fact that uniform distribution maximizes the entropy.

This gives the lower-bound on  $\Delta_t^e$  of the following form:

$$\Delta_t^e \geq \frac{M^2 G_t^e J_n^2}{8(t+1)[M(1-2\gamma)+2\gamma](M-1) \ln K},$$

and by using *Weak Hypothesis Assumption* we get

$$\Delta_t^e \geq \frac{M^2 G_t^e \gamma^2}{8(t+1)[M(1-2\gamma)+2\gamma](M-1) \ln K}$$

Following the recursion of the proof in Section 3.2 in (Choromanska et al., 2016) (note that in our case  $G_1^e \leq 2(M-1) \ln K$ ), we obtain that under the *Weak Hypothesis Assumption*, for any  $\kappa \in [0, 2(M-1) \ln K]$ , to obtain  $G_t^e \leq \kappa$  it suffices to make

$$t \geq \left( \frac{2(M-1) \ln K}{\kappa} \right)^{\frac{16[M(1-2\gamma)+2\gamma](M-1) \ln K}{M^2 \log_2 e \gamma^2}}$$

splits. We next proceed to directly proving the error bound. Denote  $w(l)$  to be the probability that a data point  $x$  reached leaf  $l$ . Recall that  $q_i^{(l)}$  is the probability that the data point  $x$  corresponds to label  $i$  given that  $x$  reached  $l$ , i.e.  $q_i^{(l)} = P(y(x) = i | x \text{ reached } l)$ . Let the label assigned to the leaf be the majority label and thus lets assume that the leaf is assigned to label  $i$  if and only if the following is true  $\forall_{z=\{1,2,\dots,k\}} q_i^{(l)} \geq q_z^{(l)}$ . Therefore we can write that

$$\epsilon(\mathcal{T}) = \sum_{i=1}^K P(t(x) = i, y(x) \neq i) \tag{19}$$

$$\begin{aligned}
 &= \sum_{l \in \mathcal{L}} w(l) \sum_{i=1}^K P(t(x) = i, y(x) \neq i | x \text{ reached } l) \\
 &= \sum_{l \in \mathcal{L}} w(l) \sum_{i=1}^K P(y(x) \neq i | t(x) = i, x \text{ reached } l) P(t(x) = i | x \text{ reached } l) \\
 &= \sum_{l \in \mathcal{L}} w(l) (1 - \max(q_1^{(l)}, q_2^{(l)}, \dots, q_K^{(l)})) \sum_{i=1}^K P(t(x) = i | x \text{ reached } l) \\
 &= \sum_{l \in \mathcal{L}} w(l) (1 - \max(q_1^{(l)}, q_2^{(l)}, \dots, q_K^{(l)})) \tag{20}
 \end{aligned}$$



Consider again the Shannon entropy  $G(\mathcal{T})$  of the leaves of tree  $\mathcal{T}$  that is defined as

$$G^e(\mathcal{T}) = \sum_{l \in \mathcal{L}} w(l) \sum_{i=1}^K q_i^{(l)} \log_2 \frac{1}{q_i}. \quad (21)$$

Let  $i_l = \arg \max_{i \in \{1, 2, \dots, K\}} q_i^{(l)}$ . Note that

$$\begin{aligned} G^e(\mathcal{T}) &= \sum_{l \in \mathcal{L}} w(l) \sum_{i=1}^K q_i^{(l)} \log_2 \frac{1}{q_i} \\ &\geq \sum_{l \in \mathcal{L}} w(l) \sum_{\substack{i=1 \\ i \neq i_l}}^K q_i^{(l)} \log_2 \frac{1}{q_i} \\ &\geq \sum_{l \in \mathcal{L}} w(l) \sum_{\substack{i=1 \\ i \neq i_l}}^K q_i^{(l)} \\ &= \sum_{l \in \mathcal{L}} w(l) (1 - \max(q_1^{(l)}, q_2^{(l)}, \dots, q_K^{(l)})) \\ &= \epsilon(\mathcal{T}), \end{aligned} \quad (22)$$

where the last inequality comes from the fact that  $\forall_{i \in \{1, 2, \dots, K\}} q_i^{(l)} \leq 0.5$  and thus  $\forall_{i \in \{1, 2, \dots, K\}} \frac{1}{q_i^{(l)}} \in [2; +\infty]$  and consequently  $\forall_{i \in \{1, 2, \dots, K\}} \log_2 \frac{1}{q_i^{(l)}} \in [1; +\infty]$ .

We next use the proof of Theorem 6 in (Choromanska et al., 2016). The proof modifies only slightly for our purposes and thus we only list these modifications below.

- Since we define the Shannon entropy through logarithm with base 2 instead of the natural logarithm, the right hand side of inequality (2.6) in (Shalev-Shwartz, 2012) should have an additional multiplicative factor equal to  $\frac{1}{\ln 2}$  and thus the right-hand side of the inequality stated in Lemma 14 has to have the same multiplicative factor.
- For the same reason as above, the right-hand side of the inequality in Lemma 9 should take logarithm with base 2 of  $k$  instead of the natural logarithm of  $k$ .

Propagating these changes in the proof of Theorem 6 results in the statement of Theorem 1.

□

*Proof of Corollary 1.* Note that the lower-bound on  $\Delta_t^e$  from the previous prove could be made tighter as follows:

$$\begin{aligned} \Delta_t^e &\geq w \frac{1}{2} \sum_{j=1}^M \frac{1}{p_j} \left( \sum_{i=1}^K q_i |p_{j|i} - p_j| \right)^2 \\ &= w \frac{M^2}{2} \sum_{j=1}^M \frac{1}{M} \left( \sum_{i=1}^K q_i |p_{j|i} - p_j| \right)^2 \\ &\geq w \frac{M^2}{2} \left( \sum_{j=1}^M \frac{1}{M} \sum_{i=1}^K q_i |p_{j|i} - p_j| \right)^2 \\ &= w \frac{M^2}{8} \left( \frac{2}{M} \sum_{j=1}^M \sum_{i=1}^K q_i |p_{j|i} - p_j| \right)^2 \\ &= \frac{M^2 w J_n^2}{8}, \end{aligned}$$

| $d$ | Model        | Arity | Prec        | Rec         | Train      | Test      |
|-----|--------------|-------|-------------|-------------|------------|-----------|
| 50  | TagSpace     | -     | 30.1        | -           | 3h8        | 6h        |
|     | FastText     | 2     | 27.2        | 4.17        | <b>8m</b>  | <b>1m</b> |
|     | Huffman Tree | 5     | 28.3        | 4.33        | <b>8m</b>  | <b>1m</b> |
|     |              | 20    | 29.9        | 4.58        | 10m        | 3m        |
|     | Learned Tree | 5     | 31.6        | 4.85        | 18m        | <b>1m</b> |
|     |              | 20    | <b>32.1</b> | <b>4.92</b> | 30m        | 3m        |
| 200 | TagSpace     | -     | 35.6        | -           | 5h32       | 15h       |
|     | FastText     | 2     | 35.2        | 5.4         | <b>12m</b> | <b>1m</b> |
|     | Huffman Tree | 5     | 35.8        | 5.5         | 13m        | 2m        |
|     |              | 20    | 36.4        | 5.59        | 18m        | 3m        |
|     | Learned Tree | 5     | 36.1        | 5.53        | 35m        | 3m        |
|     |              | 20    | <b>36.6</b> | <b>5.61</b> | 45m        | 8m        |

Table 3. Classification performance on the YFCC100M dataset.

| Model         | perp. | train ms/batch | test ms/batch |
|---------------|-------|----------------|---------------|
| Random Tree   | 172   | 5.1            | 2.7           |
| Flat soft-max | 151   | 11.5           | 5.1           |
| Learned Tree  | 159   | 6.3            | 2.6           |

Table 4. Comparison of a flat soft-max to a 25-ary hierarchical soft-max (learned, random and heuristic-based tree).

where the first inequality was taken from the proof of Theorem 1 and the following equality follows from the fact that each node is balanced. By next following exactly the same steps as shown in the proof of Theorem 1 we obtain the corollary.  $\square$

## 11. Experimental Setting

### 11.1. Classification

For the YFCC100M experiments, we learned our models with SGD with a linearly decreasing rate for five epochs. We run a hyper-parameter search on the learning rate (in  $\{0.01, 0.02, 0.05, 0.1, 0.25, 0.5\}$ ). In the learned tree settings, the learning rate stays constant for the first half of training, during which the AssignLabels() routine is called 50 times. We run the experiments in a Hogwild data-parallel setting using 12 threads on an Intel Xeon E5-2690v4 2.6GHz CPU. At prediction time, we perform a truncated depth first search to find the most likely label (using the same idea as in a branch-and-bound algorithm: if a node score is less than that of the best current label, then all of its descendants are out).

### 11.2. Density Estimation

In our experiments, we use a context window size of 4. We optimize the objectives with Adagrad, run a hyper-parameter search on the batch size (in  $\{32, 64, 128\}$ ) and learning rate (in  $\{0.01, 0.02, 0.05, 0.1, 0.25, 0.5\}$ ). The hidden representation dimension is 200. In the learned tree settings, the AssignLabels() routine is called 50 times per epoch. We used a 12GB NVIDIA GeForce GTX TITAN GPU and all tree-based models are 65-ary for the Gutenberg data and 25-ary for Pen TreeBank. Table 4 provides the perplexity and speed results on the PTB text.

For the Cluster Tree, we learn dimension 50 word embeddings with FastTree for 5 epochs using a hierarchical softmax loss, then obtain  $45 = 65^2$  centroids using the ScikitLearn implementation of MiniBatchKmeans, and greedily assign words to clusters until full (when a cluster has 65 words).

**Algorithm 3** Label Assignment Algorithm under Depth Constraint

|                                                                                                                                                                                                                                                                                                                                                                                                                                                                                                                                                                                                                                                                                                                                                                                                                                                                                                                                                                                                                                                                                                                                                                                                                           |                                                                                                                                                                                                                                                                                                                                                                                                                                                                                                                                                                                                                                                                                                                                                                                                                                                                                                                                                                                                                                                                                                                                                                                                                                                                                                                                               |
|---------------------------------------------------------------------------------------------------------------------------------------------------------------------------------------------------------------------------------------------------------------------------------------------------------------------------------------------------------------------------------------------------------------------------------------------------------------------------------------------------------------------------------------------------------------------------------------------------------------------------------------------------------------------------------------------------------------------------------------------------------------------------------------------------------------------------------------------------------------------------------------------------------------------------------------------------------------------------------------------------------------------------------------------------------------------------------------------------------------------------------------------------------------------------------------------------------------------------|-----------------------------------------------------------------------------------------------------------------------------------------------------------------------------------------------------------------------------------------------------------------------------------------------------------------------------------------------------------------------------------------------------------------------------------------------------------------------------------------------------------------------------------------------------------------------------------------------------------------------------------------------------------------------------------------------------------------------------------------------------------------------------------------------------------------------------------------------------------------------------------------------------------------------------------------------------------------------------------------------------------------------------------------------------------------------------------------------------------------------------------------------------------------------------------------------------------------------------------------------------------------------------------------------------------------------------------------------|
| <p><b>Input</b> Node statistics, max depth <math>D</math><br/>                 Paths from root to labels: <math>\mathcal{P} = (\mathbf{c}^i)_{i=1}^K</math><br/>                 node ID <math>n</math> and depth <math>d</math><br/>                 List of labels currently reaching the node</p> <p><b>Output</b> Updated paths<br/>                 Lists of labels now assigned to each of <math>n</math>'s children under depth constraints</p> <p><b>procedure</b> AssignLabels (labels, <math>n</math>, <math>d</math>)<br/> <i>// first, compute <math>p_j^{(n)}</math> and <math>p_{j i}^{(n)}</math>. <math>\odot</math> is the element-wise multiplication</i><br/> <math>\mathbf{p}_0^{avg} \leftarrow \mathbf{0}</math><br/>                 count <math>\leftarrow 0</math><br/> <b>for</b> <math>i</math> in labels <b>do</b><br/> <math>\mathbf{p}_0^{avg} \leftarrow \mathbf{p}_0^{avg} + \text{SumProbas}_{n,i}</math><br/>                 count <math>\leftarrow</math> count + <math>\text{Counts}_{n,i}</math><br/> <math>\mathbf{p}_i^{avg} \leftarrow \text{SumProbas}_{n,i} / \text{Counts}_{n,i}</math><br/> <math>\mathbf{p}_0^{avg} \leftarrow \mathbf{p}_0^{avg} / \text{count}</math></p> | <p><i>// then, assign each label to a child of <math>n</math> under depth constraints</i><br/>                 unassigned <math>\leftarrow</math> labels<br/>                 full <math>\leftarrow \emptyset</math><br/> <b>for</b> <math>j = 1</math> to <math>M</math> <b>do</b><br/>                 assigned<math>_j \leftarrow \emptyset</math><br/> <b>while</b> unassigned <math>\neq \emptyset</math> <b>do</b><br/> <i>// <math>\frac{\partial J_n}{\partial p_{j i}^{(n)}}</math> is given in Equation 10</i><br/> <math>(i^*, j^*) \leftarrow \underset{i \in \text{unassigned}, j \notin \text{full}}{\text{argmax}} \left( \frac{\partial J_n}{\partial p_{j i}^{(n)}} \right)</math><br/> <math>\mathbf{c}_d^{i^*} \leftarrow (n, j^*)</math><br/>                 assigned<math>_{j^*} \leftarrow</math> assigned<math>_{j^*} \cup \{i^*\}</math><br/>                 unassigned <math>\leftarrow</math> unassigned <math>\setminus \{i^*\}</math><br/> <b>if</b>  assigned<math>_{j^*}</math>  = <math>M^{D-d}</math> <b>then</b><br/>                 full <math>\leftarrow</math> full <math>\cup \{j^*\}</math><br/> <b>for</b> <math>j = 1</math> to <math>M</math> <b>do</b><br/>                 AssignLabels (assigned<math>_j</math>, child<math>_{n,j}</math>, <math>d + 1</math>)<br/> <b>return</b> assigned</p> |
|---------------------------------------------------------------------------------------------------------------------------------------------------------------------------------------------------------------------------------------------------------------------------------------------------------------------------------------------------------------------------------------------------------------------------------------------------------------------------------------------------------------------------------------------------------------------------------------------------------------------------------------------------------------------------------------------------------------------------------------------------------------------------------------------------------------------------------------------------------------------------------------------------------------------------------------------------------------------------------------------------------------------------------------------------------------------------------------------------------------------------------------------------------------------------------------------------------------------------|-----------------------------------------------------------------------------------------------------------------------------------------------------------------------------------------------------------------------------------------------------------------------------------------------------------------------------------------------------------------------------------------------------------------------------------------------------------------------------------------------------------------------------------------------------------------------------------------------------------------------------------------------------------------------------------------------------------------------------------------------------------------------------------------------------------------------------------------------------------------------------------------------------------------------------------------------------------------------------------------------------------------------------------------------------------------------------------------------------------------------------------------------------------------------------------------------------------------------------------------------------------------------------------------------------------------------------------------------|

| Leaf 229   | Leaf 230 | Leaf 300    | Leaf 231  |
|------------|----------|-------------|-----------|
| suggested  | vegas    | payments    | operates  |
| watched    | &        | buy-outs    | includes  |
| created    | calif.   | swings      | intends   |
| violated   | park     | gains       | makes     |
| introduced | n.j.     | taxes       | means     |
| discovered | conn.    | operations  | helps     |
| carried    | pa.      | profits     | seeks     |
| described  | pa.      | penalties   | reduces   |
| accepted   | ii       | relations   | continues |
| listed     | d.       | liabilities | fails     |
| ...        | ...      | ...         | ...       |

Table 5. Example of labels reaching leaf nodes in the final tree. We can identify a leaf for 3rd person verbs, one for past participles, one for plural nouns, and one (loosely) for places.
